# Supplementary material for: Axial coordination-assisted interwoven isomerism in 3D hydrogen-bonded organic frameworks for efficient natural gas purification
Source: Royal Society of Chemistry journal article supplement (doi:10.1039/d4ta04918g), 2024-01-01
Supplement: d4ta04918g1.pdf [file d4ta04918g1.pdf]

Supporting Information

**Axial Coordination-Assisted Interwoven Isomerism in 3D Hydrogen-Bonded Organic Frameworks for Efficient Natural Gas Purification**

*Hyunjun Park<sup>1‡</sup>, Kwang Hyun Oh<sup>2‡</sup>, Jae Hwa Lee<sup>3‡</sup>, Younghun Kim<sup>1</sup>, Jeong Heon Lee<sup>1</sup>, Hoi Ri Moon<sup>4\*</sup>, Youn-Sang Bae<sup>2\*</sup>, and Woo-Dong Jang<sup>1\*</sup>*

<sup>1</sup>Department of Chemistry, Yonsei University, 50 Yonsei-ro, Seodaemun-gu, Seoul 03722, Republic of Korea

<sup>2</sup>Department of Chemical and Biomolecular Engineering, Yonsei University, 50 Yonsei-ro, Seodaemun-gu, Seoul 03722, Republic of Korea

<sup>3</sup>Department of Chemistry, Ulsan National Institute of Science and Technology (UNIST), 50, UNIST-gil, Ulsan 44919, Republic of Korea

<sup>4</sup>Department of Chemistry and Nanoscience, Ewha Womans University, Seoul 03760, Republic of Korea

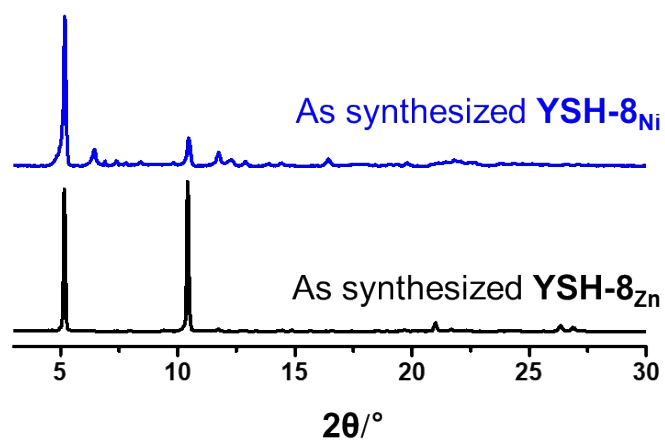

Figure S1. PXRD pattern of a) YSH-8<sub>Zn</sub> and b) YSH-8<sub>Ni</sub>.

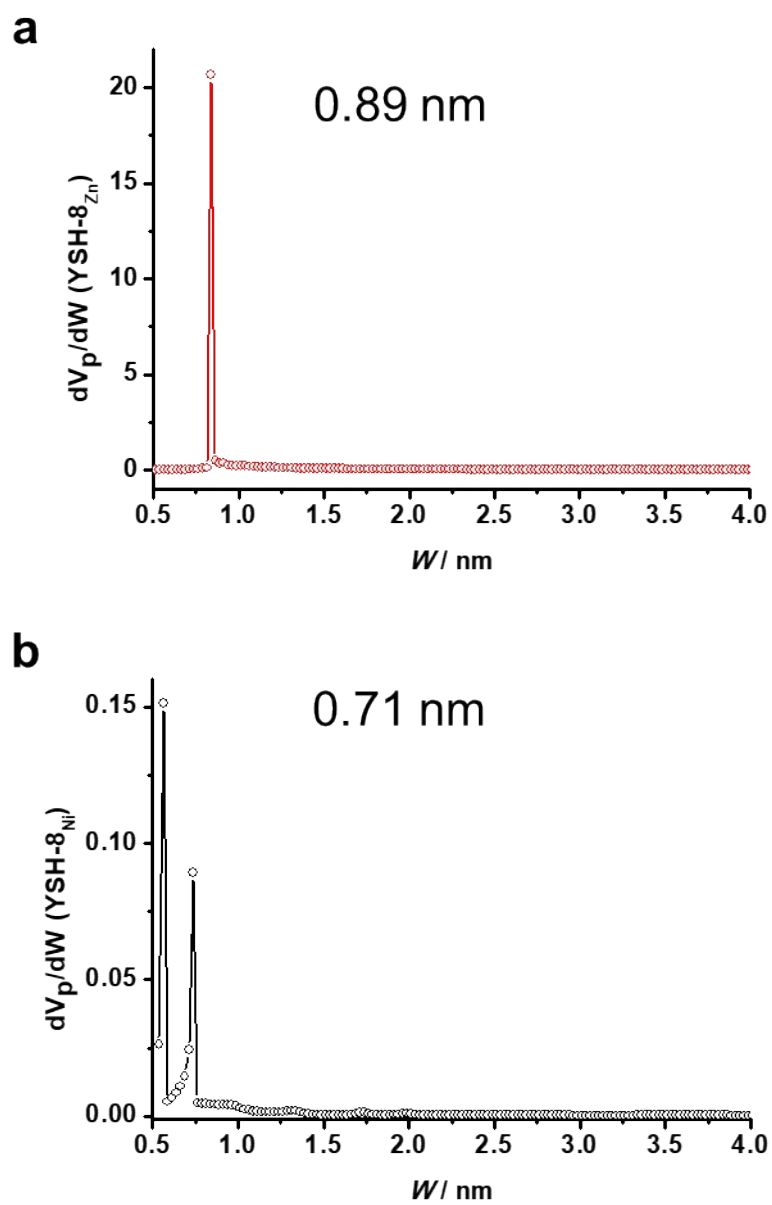

Figure S2. Pore size distribution of a) YSH-8<sub>Zn/Hx</sub>\* , b) YSH-8<sub>Ni</sub>\* .

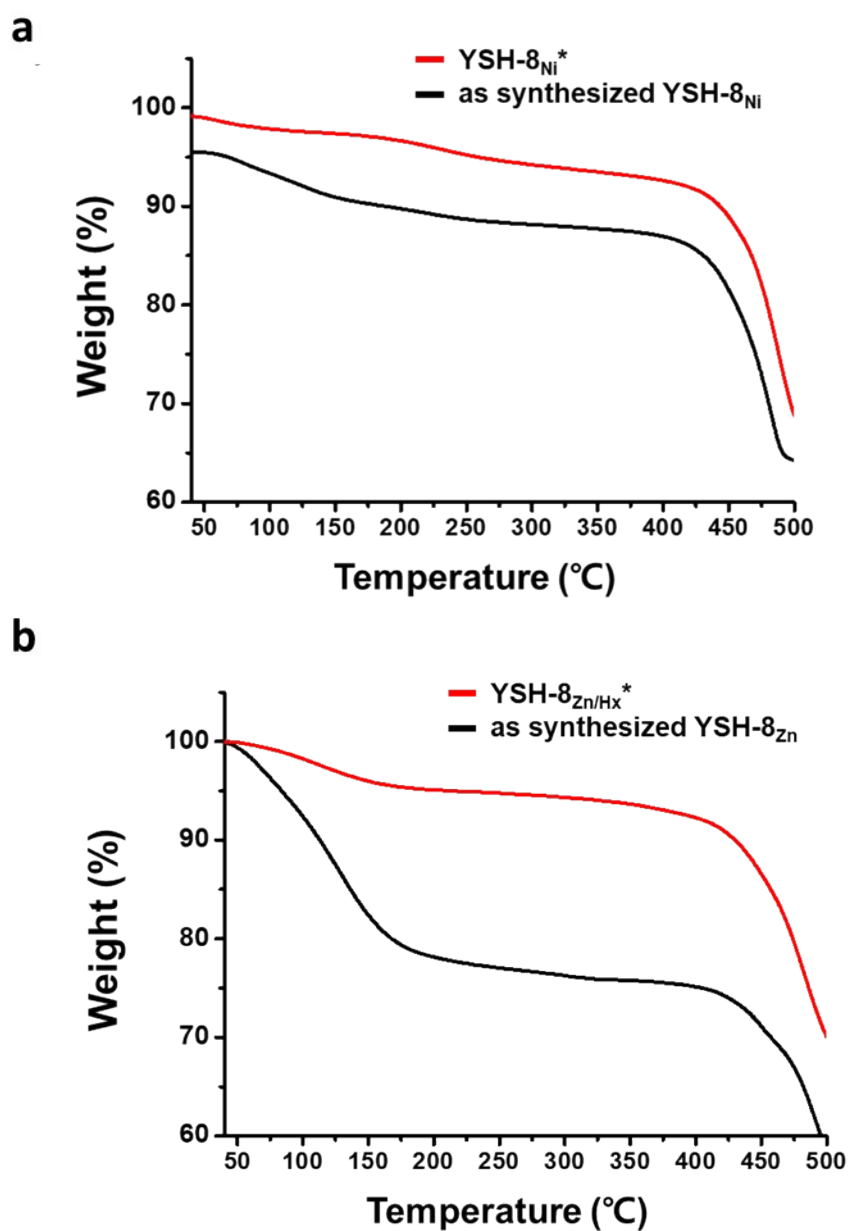

Figure S3. TGA curve of a) YSH-8<sub>Ni</sub> and b) YSH-8<sub>Zn</sub>.

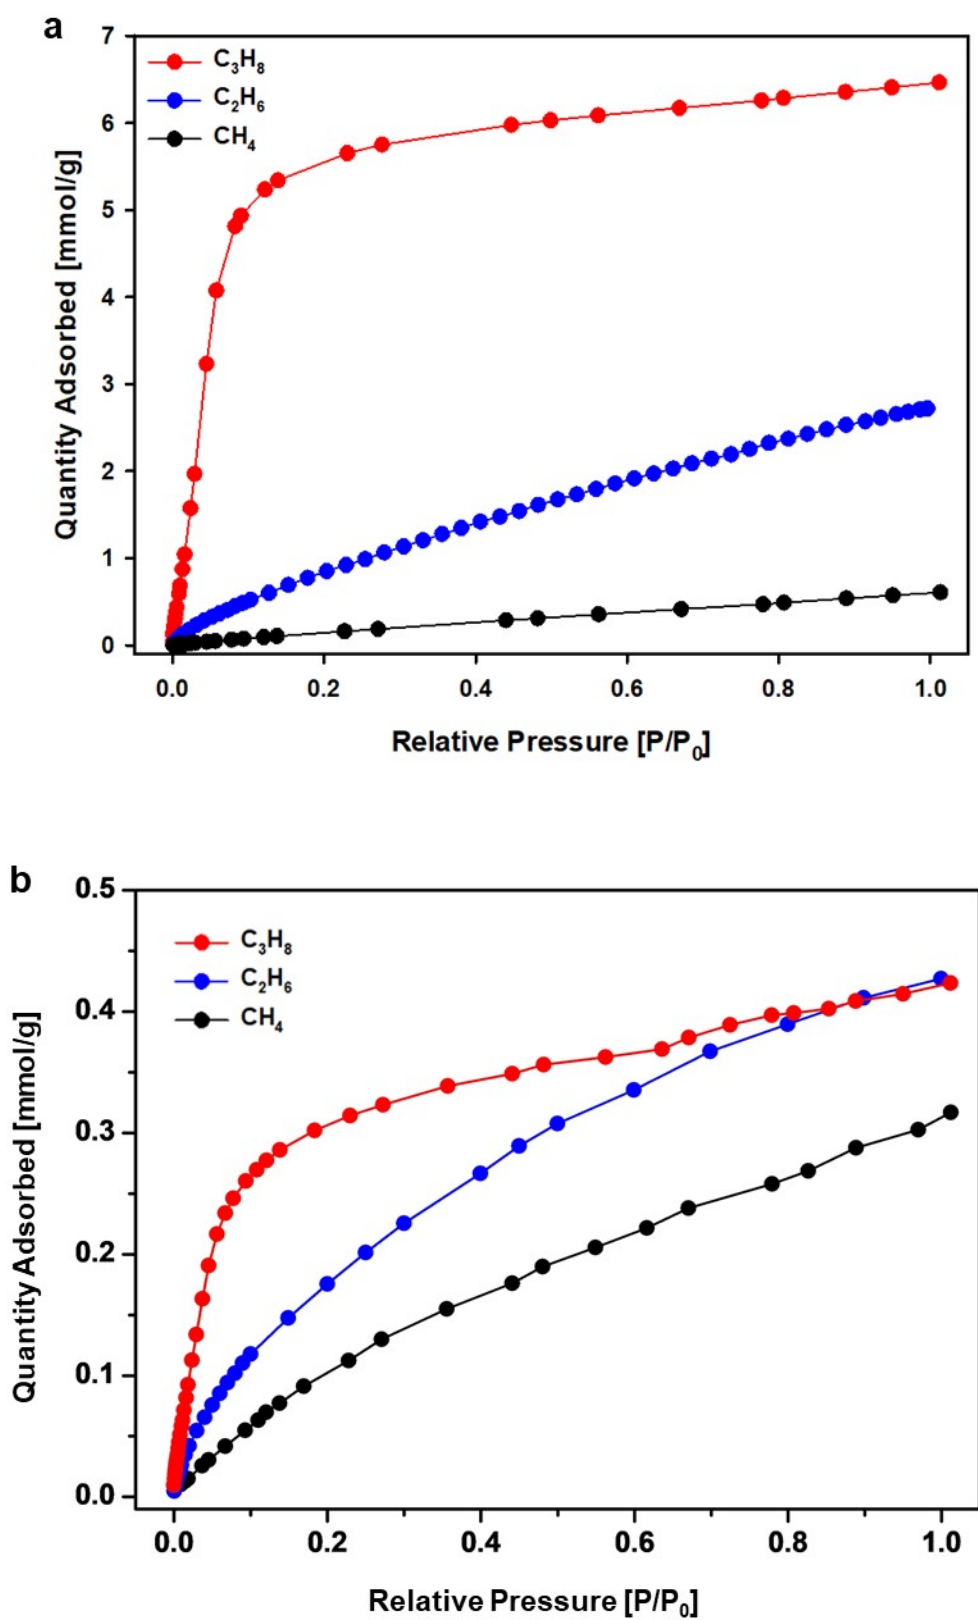

Figure S4. Single gas absorption isotherm of  $C_3H_8$ ,  $C_2H_6$  and  $CH_4$  at 273 K of a)  $YSH-8_{Zn/Hx}^*$  and b)  $YSH-8_{Ni}^*$ .

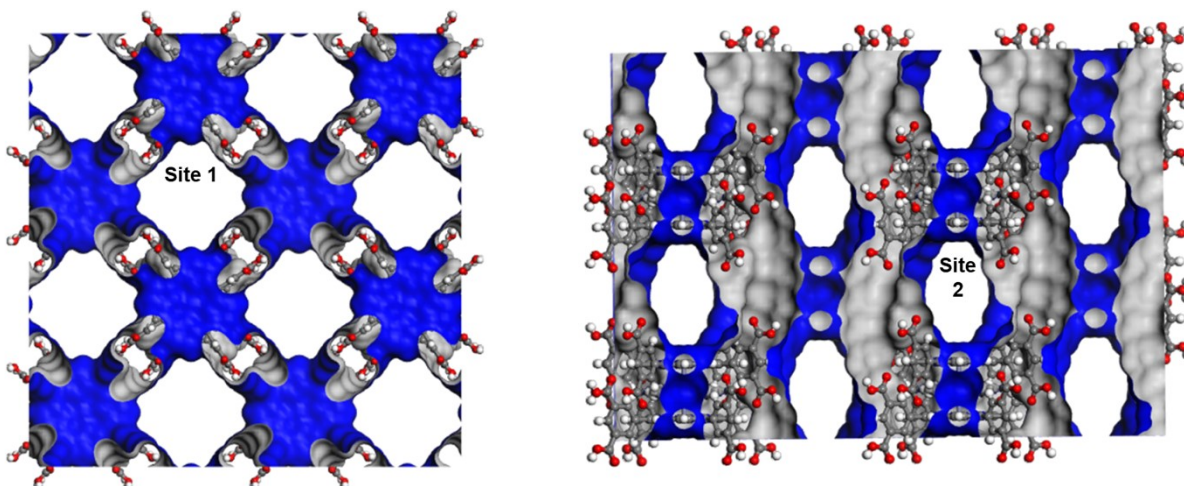

Figure S5. Adsorption site of  $C_3H_8$  and  $C_2H_6$  in  $YSH-8_{Zn/Hx}$ .

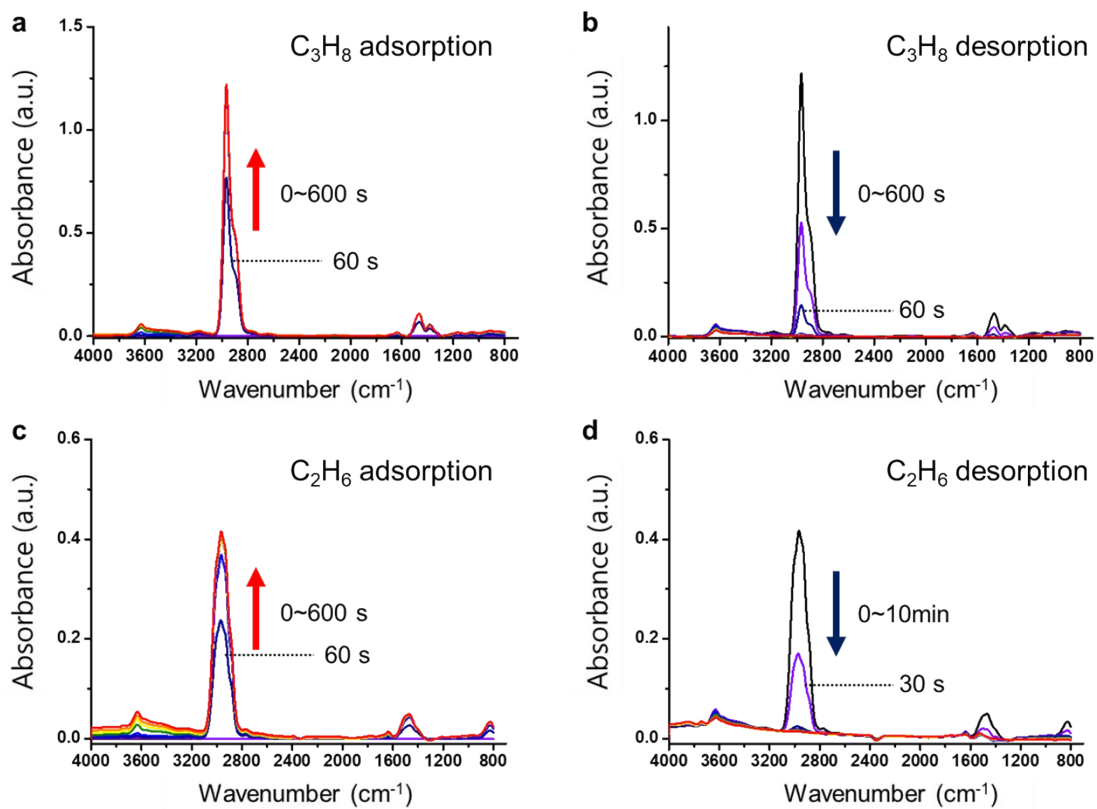

Figure S6. In-situ DRIFT spectra of  $YSH-8_{Zn/Hx}$ \* a)  $C_3H_8$  adsorption, b)  $C_3H_8$  desorption; c)  $C_2H_6$  adsorption and d)  $C_2H_6$  desorption.

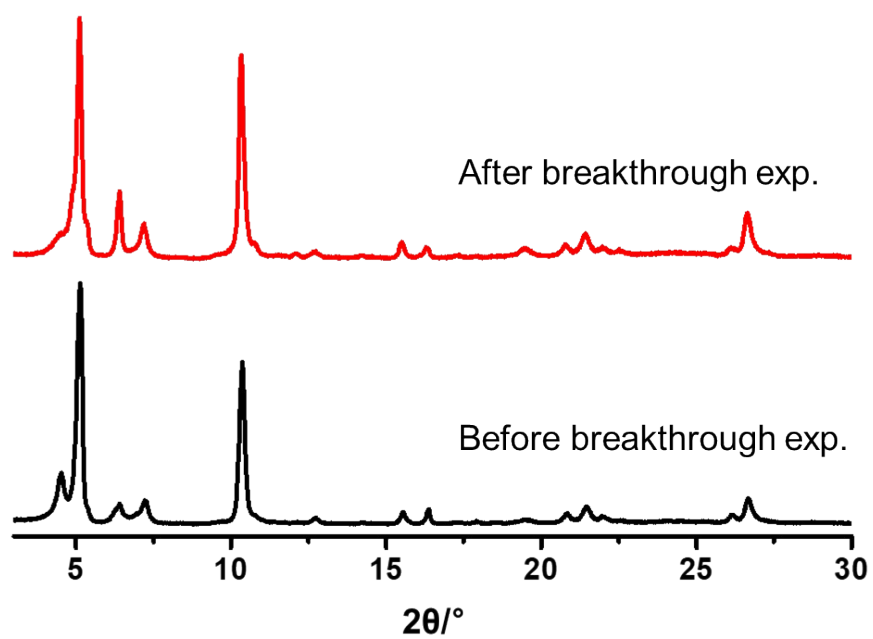

**Figure S7.** PXRD pattern of YSH-8<sub>zn</sub>\* after breakthrough experiment.

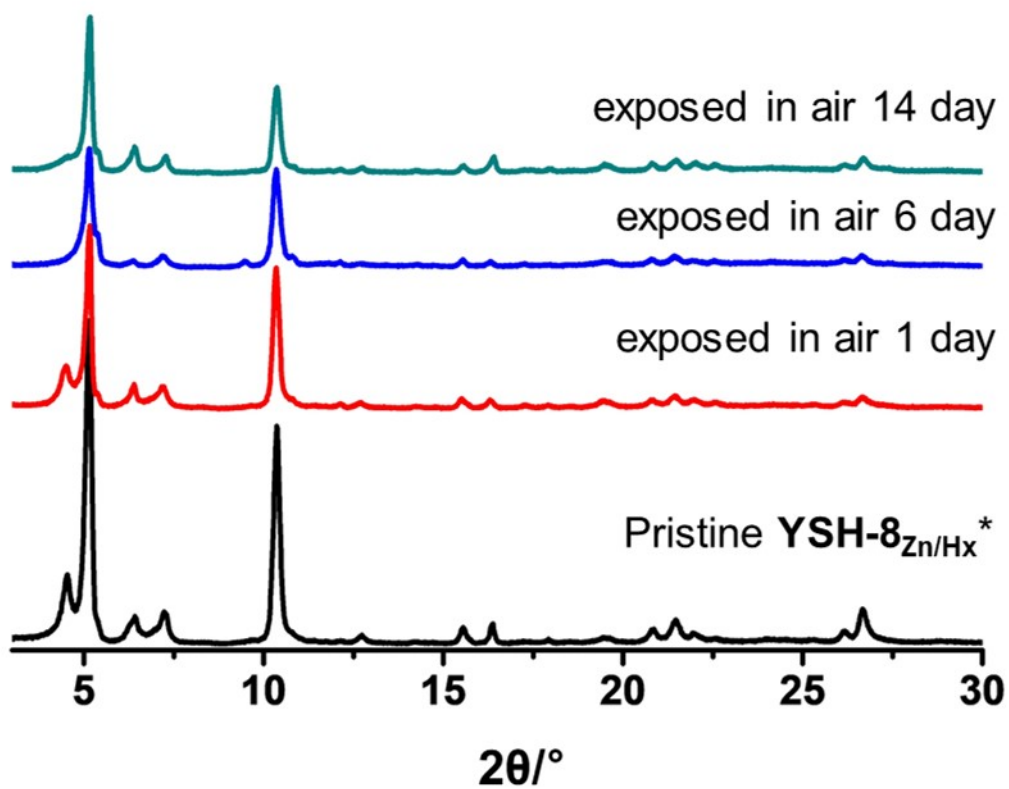

Figure S8. PXRD pattern of  $\text{YSH-8}_{\text{Zn/Hx}}^*$  after exposure in air.



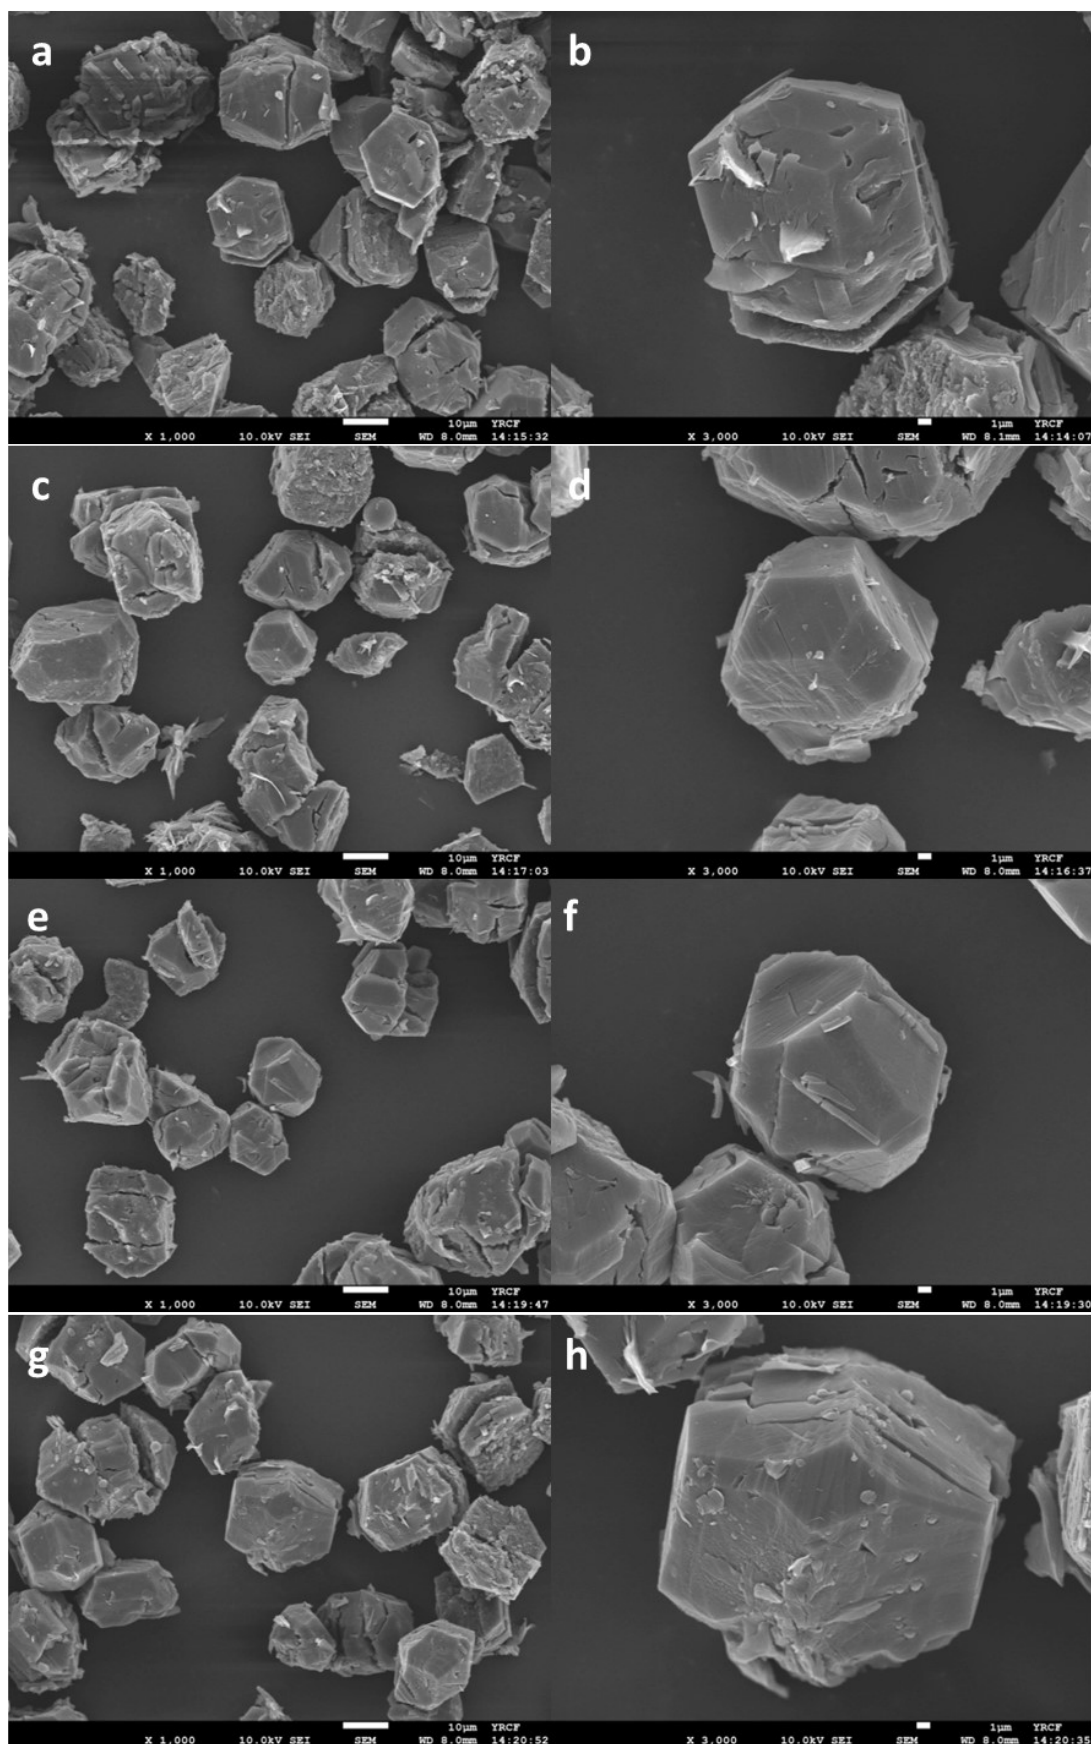

**Figure S9.** SEM images of YSH-8<sub>Zn/Hx</sub>\* a) and b) pristine; c) and d) after  $C_3H_8$  adsorption; e) and f) after  $C_2H_6$  adsorption; g) and h) after  $CH_4$  adsorption.

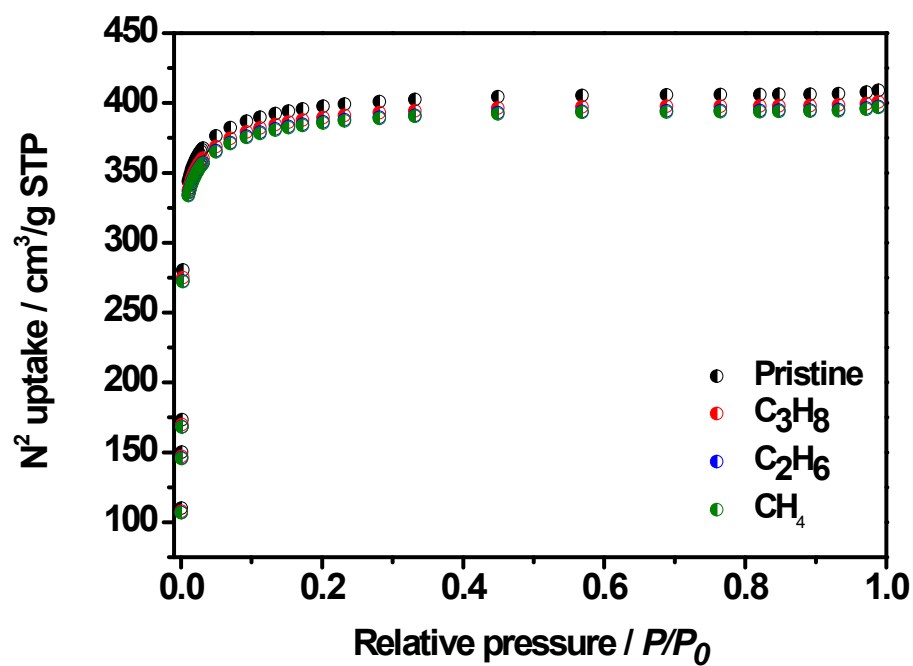

Figure S10. Comparison of 77K N<sub>2</sub> Isotherm of YSH-8<sub>Zn/HX</sub>\* after C<sub>3</sub>H<sub>8</sub>, C<sub>2</sub>H<sub>6</sub>, and CH<sub>4</sub> adsorption.

**Table S1.** Comparison with benchmark adsorbents.

| Material                      | BET surface area (m <sup>2</sup> /g) | Gas uptake at 298 K (mmol/g)  |                               |                 | IAST (298 K/ gas ratio 50:50)                                |                                                |                                                | Ref.      |
|-------------------------------|--------------------------------------|-------------------------------|-------------------------------|-----------------|--------------------------------------------------------------|------------------------------------------------|------------------------------------------------|-----------|
|                               |                                      | C <sub>3</sub> H <sub>8</sub> | C <sub>2</sub> H <sub>6</sub> | CH <sub>4</sub> | C <sub>3</sub> H <sub>8</sub> /C <sub>2</sub> H <sub>6</sub> | C <sub>3</sub> H <sub>8</sub> /CH <sub>4</sub> | C <sub>2</sub> H <sub>6</sub> /CH <sub>4</sub> |           |
| <b>YSH-8<sub>Zn/Hx</sub>*</b> | 1665                                 | 6.46                          | 2.06                          | 0.239           | 36.9                                                         | 492                                            | 22.2                                           | This work |
| MOF 1                         | 1125                                 | 3.56                          | 4.55                          | 0.68            | 10.9                                                         | 638.9                                          | 61.0                                           | 1         |
| ZUL-C2                        | 417                                  | 2.52                          | 2.82                          | -               | -                                                            | 632                                            | 91                                             | 2         |
| UPC-99                        | 886                                  | 4.85                          | 2.72                          | 0.44            | 4.9                                                          | 426.8                                          | -                                              | 3         |
| BSF-1                         | 535                                  | 1.94                          | 1.57                          | 0.47            | -                                                            | 353                                            | 23                                             | 4         |
| UPC-100-IN                    | 1677.7                               | 5.30                          | 3.15                          | 0.52            | -                                                            | 186.4                                          | -                                              | 5         |
| JLU-Liu45                     | 971                                  | 3.79                          | 3.78                          | 0.69            | -                                                            | 42.7                                           | 20.1                                           | 6         |
| UiO-67                        | 2591                                 | 8.2                           | 3.0                           | 0.5             | -                                                            | 73.7                                           | 8.1                                            | 7         |
| PFC-5                         | 256                                  | -                             | 1.15(5)                       | 0.356(9)        | -                                                            | -                                              | 84                                             | 8         |
| HOF-BTB                       | 955                                  | -                             | 3.09                          | 0.39            | -                                                            | -                                              | 13.7                                           | 9         |
| HOF-14                        | 2573                                 | 8.09(3)                       | 1.97(1)                       | 0.34(7)         | -                                                            | 28.6                                           | 6.3                                            | 10        |
| ZJU-HOF-8a                    | 863                                  | 3.05                          | 2.5                           | 0.50            | -                                                            | 123 <sup>a</sup>                               | 18 <sup>a</sup>                                | 11        |
| HOF-TCBP                      | 2066                                 | -                             | -                             | 0.328           | -                                                            | -                                              | -                                              | 12        |
| HOF-ZJU-201a                  | 423                                  | 2.61                          | 3.16                          | 1.73            | -                                                            | 119                                            | 45                                             | 13        |
| HOF-ZJU-202a                  | 366                                  | 1.85                          | 2.53                          | 1.50            | -                                                            | 40                                             | 36                                             | 13        |
| HOF-16                        | 302                                  | -                             | -                             | 0.339           | -                                                            | -                                              | -                                              | 14        |

a) 0.05/0.95

**Table S2.** IAST fitting parameter.

|                               | q <sub>m,1</sub> | b <sub>1</sub> | n <sub>1</sub> | q <sub>m,2</sub> | b <sub>2</sub> | n <sub>2</sub> | R <sup>2</sup> |
|-------------------------------|------------------|----------------|----------------|------------------|----------------|----------------|----------------|
| CH <sub>4</sub>               | 6.5E-2           | 1.10           | 5.91           | 0.39             | 1.03           | 1.21           | 0.999          |
| C <sub>2</sub> H <sub>6</sub> | 4.85             | 5.1E-3         | 1.53           | 1.25             | 1.82E-2        | 0.85           | 0.999          |
| C <sub>3</sub> H <sub>8</sub> | 3.63             | 0.15           | 0.78           | 3.10             | 0.24           | 3.20           | 0.999          |

## Single crystal information

**Table S3.** X-ray crystallographic data for **YSH-8<sub>Ni</sub>**.

| Compound                                                                    | <b>YSH-8<sub>Ni</sub></b>                                                         |
|-----------------------------------------------------------------------------|-----------------------------------------------------------------------------------|
| Formula                                                                     | C <sub>39</sub> H <sub>21</sub> N <sub>3</sub> Ni <sub>0.75</sub> O <sub>12</sub> |
| Formula weight                                                              | 767.62                                                                            |
| Temperature, K                                                              | 298                                                                               |
| $\lambda$ , Å                                                               | <i>tetragonal</i>                                                                 |
| Crystal system                                                              | P4/nnc                                                                            |
| Space group                                                                 | 24.1698(19)                                                                       |
| <i>a</i> , Å                                                                | 24.1698(19)                                                                       |
| <i>b</i> , Å                                                                | 25.181(4)                                                                         |
| <i>c</i> , Å                                                                | 90                                                                                |
| $\alpha$ , °                                                                | 90                                                                                |
| $\beta$ , °                                                                 | 90                                                                                |
| $\gamma$ , °                                                                | 90                                                                                |
| <i>V</i> , Å <sup>3</sup>                                                   | 14710(3)                                                                          |
| <i>Z</i>                                                                    | 8                                                                                 |
| $\rho_{\text{calcd}}$ , g cm <sup>-3</sup>                                  | 0.693                                                                             |
| $\mu$ , mm <sup>-1</sup>                                                    | 0.612                                                                             |
| <i>F</i> (000)                                                              | 3144.0                                                                            |
| $\theta$ range for data collection, °                                       | 5.068 to 136.662                                                                  |
| Index ranges                                                                | -28 ≤ <i>h</i> ≤ 20, -23 ≤ <i>k</i> ≤ 28, -26 ≤ <i>l</i> ≤ 30                     |
| Reflections collected                                                       | 20460                                                                             |
| Independent reflections                                                     | 6179 [R <sub>int</sub> = 0.1491, R <sub>sigma</sub> = 0.1274]                     |
| Completeness                                                                | 99.9                                                                              |
| Refinement method                                                           | Full-matrix least-squares on <i>F</i> <sup>2</sup>                                |
| Data/restraints/parameters                                                  | 6179/6/255                                                                        |
| Goodness-of-fit on <i>F</i> <sup>2</sup>                                    | 1.071                                                                             |
| <i>R</i> <sub>1</sub> , <i>wR</i> <sub>2</sub> [ <i>I</i> > 2σ( <i>I</i> )] | 0.1581, 0.3622 <sup>b</sup>                                                       |
| <i>R</i> <sub>1</sub> , <i>wR</i> <sub>2</sub> (all data)                   | 0.1970, 0.3923 <sup>b</sup>                                                       |
| Largest peak & hole, eÅ <sup>-3</sup>                                       | 2.34 and -0.51                                                                    |
| CCDC number                                                                 | 2324254                                                                           |

<sup>a</sup>  $R = \frac{\sum ||F_o| - |F_c||}{\sum |F_o|}$ ;  $wR(F^2) = \frac{[\sum w(F_o^2 - F_c^2)^2 / \sum w(F_o^2)^2]}{1/2}$  where  $w = 1/[\sigma^2(F_o^2) + (0.1000P)^2]$ ,  $P = (F_o^2 + 2F_c^2)/3$ .

<sup>b</sup>  $R = \frac{\sum ||F_o| - |F_c||}{\sum |F_o|}$ ;  $wR(F^2) = \frac{[\sum w(F_o^2 - F_c^2)^2 / \sum w(F_o^2)^2]}{1/2}$  where  $w = 1/[\sigma^2(F_o^2) + (0.2000P)^2]$ ,  $P = (F_o^2 + 2F_c^2)/3$ .

**Table S4.** Hydrogen bonds for **YSH-8<sub>Ni</sub>**.

| D-H...A             | d(H...A) [Å] | d(D...A) [Å] | ∠(DHA) |
|---------------------|--------------|--------------|--------|
| O(11)-H(11)...O(31) | 1.81         | 2.621(8)     | 169.7  |
| O(11)-H(11)...O(12) | 1.81         | 2.614(8)     | 167.7  |

**Table S5.** X-ray crystallographic data for **YSH-8<sub>Zn</sub>**.

| Compound                                                                    | <b>YSH-8<sub>Zn</sub></b>                                                       |
|-----------------------------------------------------------------------------|---------------------------------------------------------------------------------|
| Formula                                                                     | Zn <sub>2</sub> C <sub>104</sub> H <sub>56</sub> N <sub>8</sub> O <sub>34</sub> |
| Formula weight                                                              | 2092.34                                                                         |
| Temperature, K                                                              | 173(2)                                                                          |
| λ, Å                                                                        | 0.71073                                                                         |
| Crystal system                                                              | <i>Tetragonal</i>                                                               |
| Space group                                                                 | <i>P</i> <sup>4</sup> <sub>2</sub> <i>c</i>                                     |
| <i>a</i> , Å                                                                | 23.881(5)                                                                       |
| <i>b</i> , Å                                                                | 23.881(5)                                                                       |
| <i>c</i> , Å                                                                | 16.664(5)                                                                       |
| α, °                                                                        | 90                                                                              |
| β, °                                                                        | 90                                                                              |
| γ, °                                                                        | 90                                                                              |
| <i>V</i> , Å <sup>3</sup>                                                   | 9503(5)                                                                         |
| <i>Z</i>                                                                    | 2                                                                               |
| ρ <sub>calcd.</sub> , g cm <sup>-3</sup>                                    | 0.733                                                                           |
| μ, mm <sup>-1</sup>                                                         | 0.299                                                                           |
| <i>F</i> (000)                                                              | 2144                                                                            |
| θ range for data collection, °                                              | 2.961 to 24.296                                                                 |
| Index ranges                                                                | -27 ≤ <i>h</i> ≤ 27, -27 ≤ <i>k</i> ≤ 27, -18 ≤ <i>l</i> ≤ 19                   |
| Reflections collected                                                       | 50510                                                                           |
| Independent reflections                                                     | 7724 [ <i>R</i> (int) = 0.1267]                                                 |
| Completeness                                                                | 99.5 (to theta = 24.296°)                                                       |
| Refinement method                                                           | Full-matrix least-squares on <i>F</i> <sup>2</sup>                              |
| Data/restraints/parameters                                                  | 7724 / 369 / 297                                                                |
| Goodness-of-fit on <i>F</i> <sup>2</sup>                                    | 1.680                                                                           |
| <i>R</i> <sub>1</sub> , <i>wR</i> <sub>2</sub> [ <i>I</i> > 2σ( <i>I</i> )] | 0.1076, 0.2742 <sup>b</sup>                                                     |
| <i>R</i> <sub>1</sub> , <i>wR</i> <sub>2</sub> (all data)                   | 0.1537, 0.2975 <sup>b</sup>                                                     |
| Largest peak & hole, eÅ <sup>-3</sup>                                       | 0.761 and -0.664                                                                |
| CCDC number                                                                 | 2159884                                                                         |

<sup>a</sup>  $R = \frac{\sum ||F_o| - |F_c||}{\sum |F_o|}$ ;  $wR(F^2) = \frac{[\sum w(F_o^2 - F_c^2)^2 / \sum w(F_o^2)^2]}{2}$  where  $w = 1/[\sigma^2(F_o^2) + (0.1000P)^2]$ ,  $P = (F_o^2 + 2F_c^2)/3$ .

<sup>b</sup>  $R = \frac{\sum ||F_o| - |F_c||}{\sum |F_o|}$ ;  $wR(F^2) = \frac{[\sum w(F_o^2 - F_c^2)^2 / \sum w(F_o^2)^2]}{2}$  where  $w = 1/[\sigma^2(F_o^2) + (0.2000P)^2]$ ,  $P = (F_o^2 + 2F_c^2)/3$ .

**Table S6.** Hydrogen bonds for **YSH-8<sub>Zn</sub>**.

| D-H···A                           | <i>d</i> (H···A) [Å] | <i>d</i> (D···A) [Å] | ∠(DHA) |
|-----------------------------------|----------------------|----------------------|--------|
| O(15)-H(15)···O(18) <sup>#1</sup> | 1.77                 | 2.551(11)            | 153.2  |
| O(19)-H(19)···O(16) <sup>#2</sup> | 1.79                 | 2.577(10)            | 156.3  |
| O(34)-H(34)···O(37) <sup>#3</sup> | 1.76                 | 2.588(15)            | 166.3  |
| O(36)-H(36)···O(33) <sup>#4</sup> | 1.84                 | 2.650(14)            | 162.4  |

Symmetry transformations used to generate equivalent atoms:

#1 1-Y, 1-X, -1/2+Z; #2 1-Y, 1-X, 1/2+Z; #3 +Y, +X, -1/2+Z; #4 +Y, +X, 1/2+Z

**Table S7.** X-ray crystallographic data for **YSH-8<sub>Zn/Hx</sub>**.

| Compound                                                                             | YSH-8 <sub>Zn/Hx</sub>                                                          |
|--------------------------------------------------------------------------------------|---------------------------------------------------------------------------------|
| Formula                                                                              | Zn <sub>2</sub> C <sub>104</sub> H <sub>56</sub> N <sub>6</sub> O <sub>33</sub> |
| Formula weight                                                                       | 2076.30                                                                         |
| Temperature, K                                                                       | 173(2)                                                                          |
| $\lambda$ , Å                                                                        | 0.70000                                                                         |
| Crystal system                                                                       | <i>Tetragonal</i>                                                               |
| Space group                                                                          | <i>P4/nnc</i>                                                                   |
| <i>a</i> , Å                                                                         | 23.745(5)                                                                       |
| <i>b</i> , Å                                                                         | 23.745(5)                                                                       |
| <i>c</i> , Å                                                                         | 16.703(3)                                                                       |
| $\alpha$ , °                                                                         | 90                                                                              |
| $\beta$ , °                                                                          | 90                                                                              |
| $\gamma$ , °                                                                         | 90                                                                              |
| <i>V</i> , Å <sup>3</sup>                                                            | 9418(4)                                                                         |
| <i>Z</i>                                                                             | 2                                                                               |
| $\rho_{\text{calcd}}$ , g cm <sup>-3</sup>                                           | 0.732                                                                           |
| $\mu$ , mm <sup>-1</sup>                                                             | 0.289                                                                           |
| <i>F</i> (000)                                                                       | 2120                                                                            |
| $\theta$ range for data collection, °                                                | 1.194 to 32.652                                                                 |
| Index ranges                                                                         | $-28 \leq h \leq 30$ , $-29 \leq k \leq 26$ , $-22 \leq l \leq 22$              |
| Reflections collected                                                                | 47460                                                                           |
| Independent reflections                                                              | 4608 [ <i>R</i> (int) = 0.0884]                                                 |
| Completeness                                                                         | 99.3% (to $\theta = 24.835^\circ$ )                                             |
| Refinement method                                                                    | Full-matrix least-squares on <i>F</i> <sup>2</sup>                              |
| Data/restraints/parameters                                                           | 4608 / 0 / 170                                                                  |
| Goodness-of-fit on <i>F</i> <sup>2</sup>                                             | 0.983                                                                           |
| <i>R</i> <sub>1</sub> , <i>wR</i> <sub>2</sub> [ <i>I</i> > 2 $\sigma$ ( <i>I</i> )] | 0.0583, 0.1962 <sup>a</sup>                                                     |
| <i>R</i> <sub>1</sub> , <i>wR</i> <sub>2</sub> (all data)                            | 0.0916, 0.2090 <sup>a</sup>                                                     |
| Largest peak & hole, eÅ <sup>-3</sup>                                                | 1.338 and -0.372                                                                |
| CCDC number                                                                          | 2159880                                                                         |

<sup>a</sup>  $R = \sum ||F_o| - |F_c|| / \sum |F_o|$ ;  $wR(F^2) = [\sum w(F_o^2 - F_c^2)^2 / \sum w(F_o^2)^2]^{1/2}$  where  $w = 1 / [\sigma^2(F_o^2) + (0.1287P)^2]$ ,  $P = (F_o^2 + 2F_c^2) / 3$ .

**Table S8.** Hydrogen bonds for **YSH-8**<sub>Zn/Hx</sub>.

| D-H···A                        | <i>d</i> (H···A) [Å] | <i>d</i> (D···A) [Å] | ∠(DHA) |
|--------------------------------|----------------------|----------------------|--------|
| O(2)–H(2)···O(3) <sup>#1</sup> | 1.85                 | 2.589(3)             | 145.5  |
| O(4)–H(4)···O(1) <sup>#2</sup> | 1.86                 | 2.621(3)             | 150.2  |

Symmetry transformations used to generate equivalent atoms:



## References

1. Zhang, X.-X.; Guo, X.-Z.; Chen, S.-S.; Kang, H.-W.; Zhao, Y.; Gao, J.-X.; Xiong, G.-Z.; Hou, L., A stable microporous framework with multiple accessible adsorption sites for high capacity adsorption and efficient separation of light hydrocarbons. *Chem. Eng. J.* **2023**, *466*, 143170.
2. Zhou, J.; Ke, T.; Steinke, F.; Stock, N.; Zhang, Z.; Bao, Z.; He, X.; Ren, Q.; Yang, Q., Tunable Confined Aliphatic Pore Environment in Robust Metal–Organic Frameworks for Efficient Separation of Gases with a Similar Structure. *J. Am. Chem. Soc.* **2022**, *144* (31), 14322-14329.
3. Wang, X.; Zhang, X.; Zhang, K.; Wang, X.; Wang, Y.; Fan, W.; Dai, F., Amino-functionalized Cu-MOF for efficient purification of methane from light hydrocarbons and excellent catalytic performance. *Inorganic Chemistry Frontiers* **2019**, *6* (5), 1152-1157.
4. Zhang, Y.; Yang, L.; Wang, L.; Duttwyler, S.; Xing, H., A Microporous Metal-Organic Framework Supramolecularly Assembled from a CuII Dodecaborate Cluster Complex for Selective Gas Separation. *Angew. Chem. Int. Ed.* **2019**, *58* (24), 8145-8150.
5. Fan, W.; Wang, X.; Xu, B.; Wang, Y.; Liu, D.; Zhang, M.; Shang, Y.; Dai, F.; Zhang, L.; Sun, D., Amino-functionalized MOFs with high physicochemical stability for efficient gas storage/separation, dye adsorption and catalytic performance. *J. Mater. Chem. A* **2018**, *6* (47), 24486-24495.
6. Gu, J.; Sun, X.; Kan, L.; Qiao, J.; Li, G.; Liu, Y., Structural Regulation and Light Hydrocarbon Adsorption/Separation of Three Zirconium–Organic Frameworks Based on Different V-Shaped Ligands. *ACS Appl. Mater. Interfaces* **2021**, *13* (35), 41680-41687.
7. Lin, R.-G.; Li, L.; Lin, R.-B.; Arman, H.; Chen, B., Separation of C2/C1 hydrocarbons through a gate-opening effect in a microporous metal–organic framework. *CrystEngComm* **2017**, *19* (45), 6896-6901.
8. Yin, Q.; Lü, J.; Li, H.-F.; Liu, T.-F.; Cao, R., Robust Microporous Porphyrin-Based Hydrogen-Bonded Organic Framework for Highly Selective Separation of C2 Hydrocarbons versus Methane. *Crystall Growth & Design* **2019**, *19* (7), 4157-4161.
9. Yoon, T.-U.; Baek, S. B.; Kim, D.; Kim, E.-J.; Lee, W.-G.; Singh, B. K.; Lah, M. S.; Bae, Y.-S.; Kim, K. S., Efficient separation of C2 hydrocarbons in a permanently porous hydrogen-bonded organic framework. *Chem. Commun.* **2018**, *54* (67), 9360-9363.
10. Wang, B.; Lv, X.-L.; Lv, J.; Ma, L.; Lin, R.-B.; Cui, H.; Zhang, J.; Zhang, Z.; Xiang, S.; Chen, B., A novel mesoporous hydrogen-bonded organic framework with high porosity and stability. *Chem. Commun.* **2020**, *56* (1), 66-69.
11. Jiang, C.; Wang, J.-X.; Liu, D.; Wu, E.; Gu, X.-W.; Zhang, X.; Li, B.; Chen, B.; Qian, G., Supramolecular Entanglement in a Hydrogen-Bonded Organic Framework Enables Flexible-Robust Porosity for Highly Efficient Purification of Natural Gas. *Angew. Chem. Int. Ed.* **2024**, *63* (26), e202404734.
12. Hu, F.; Liu, C.; Wu, M.; Pang, J.; Jiang, F.; Yuan, D.; Hong, M., An Ultrastable and Easily Regenerated Hydrogen-Bonded Organic Molecular Framework with Permanent Porosity. *Angew. Chem. Int. Ed.* **2017**, *56* (8), 2101-2104.
13. Liu, Y.; Xu, Q.; Chen, L.; Song, C.; Yang, Q.; Zhang, Z.; Lu, D.; Yang, Y.; Ren, Q.; Bao, Z., Hydrogen-bonded metal-nucleobase frameworks for highly selective capture of ethane/propane from methane and methane/nitrogen separation. *Nano Research* **2022**, *15* (8), 7695-7702.

14. Cai, Y.; Chen, H.; Liu, P.; Chen, J.; Xu, H.; Alshahrani, T.; Li, L.; Chen, B.; Gao, J., Robust microporous hydrogen-bonded organic framework for highly selective purification of methane from natural gas. *Microporous Mesoporous Mater.* **2023**, *352*, 112495.
